# Supplementary figures and images for: Outcome of artemether-lumefantrine treatment for uncomplicated malaria in HIV-infected adult patients on anti-retroviral therapy
Source: Springer Nature journal article supplement (doi:10.1186/1475-2875-13-205), 2014-05-30

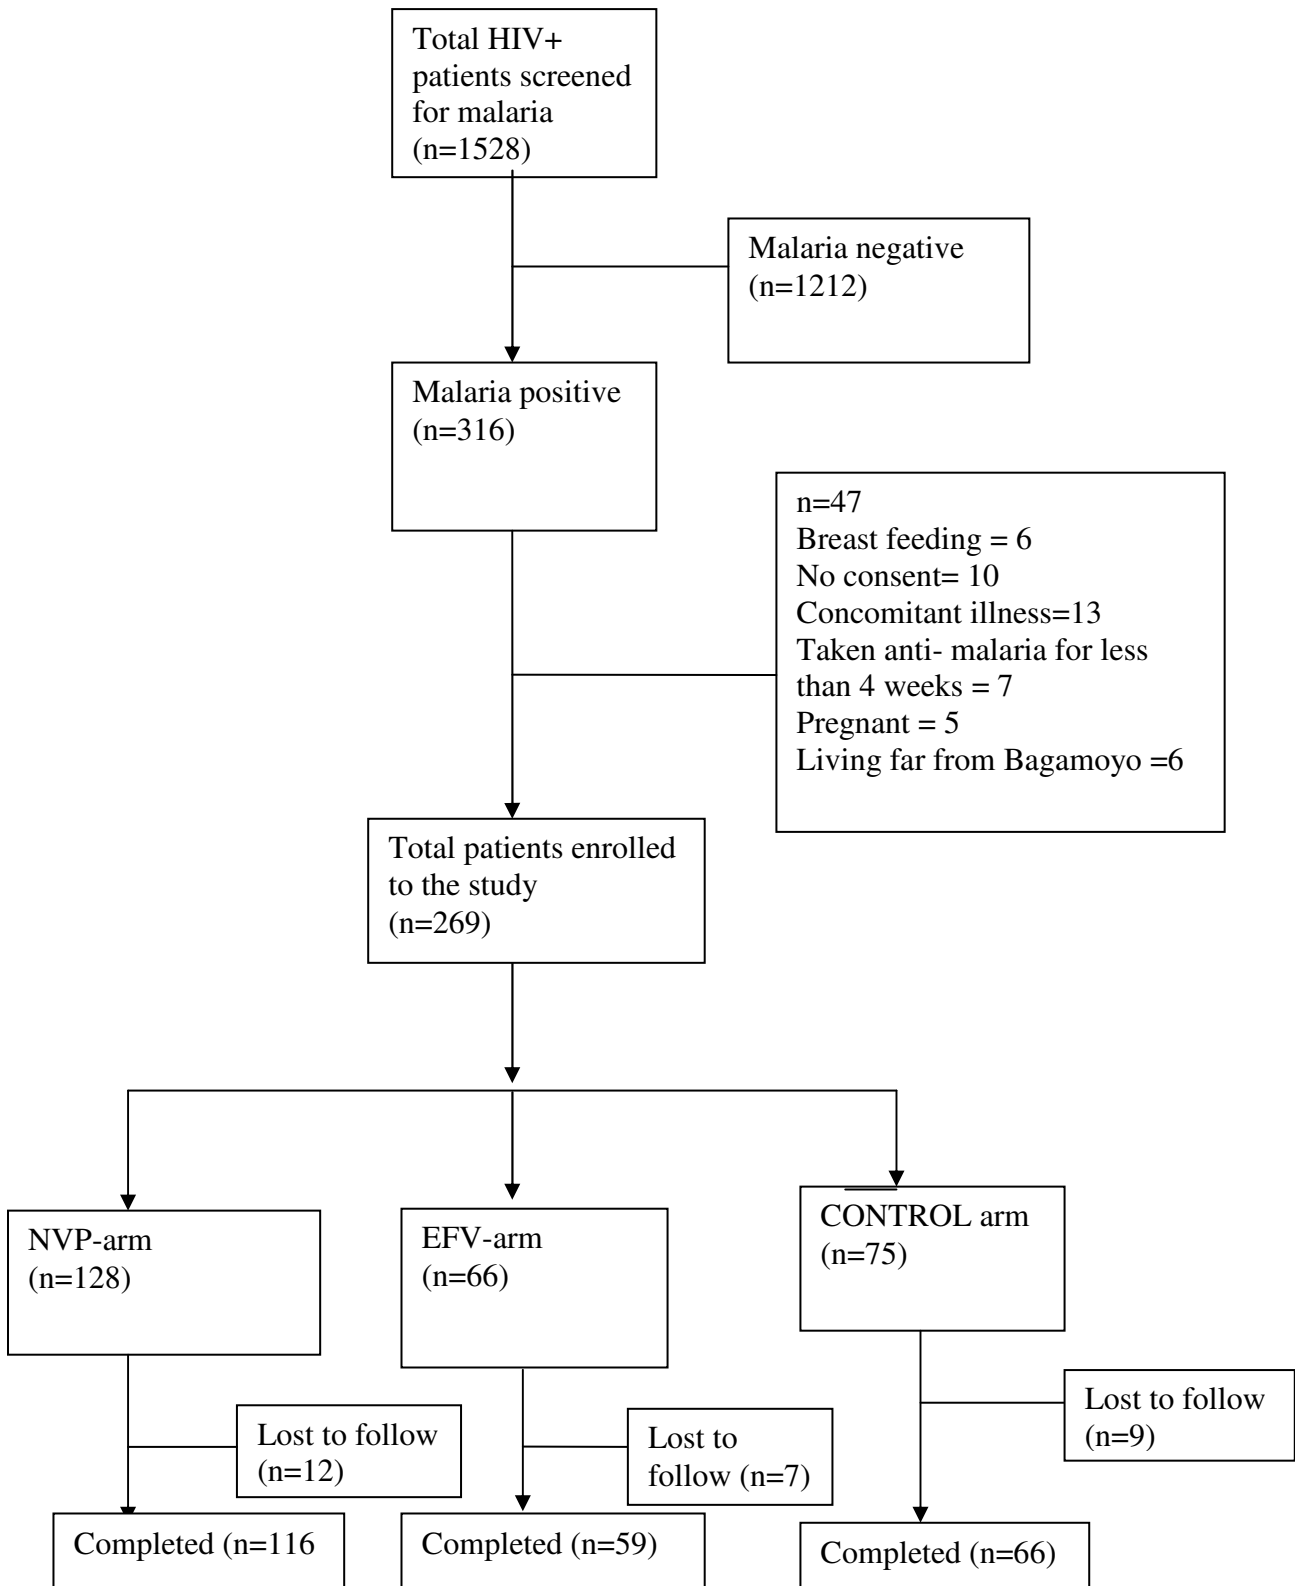

Supplement: 12936_2013_3240_MOESM1_ESM.pdf [file 12936_2013_3240_MOESM1_ESM.pdf]
